# Supplementary material for: Macromolecular hydration compared with preferential hydration and their role on macromolecule-osmolyte coupled diffusion
Source: Royal Society of Chemistry journal article supplement (doi:10.1039/b910152g), 2009-01-01
Supplement: b910152g.pdf [file b910152g.pdf]

# SUPPLEMENTARY DATA

## Interferometric diffusion data

Experimental data on individual diffusion experiments performed using the Gosting diffusimeter are reported below for the PEG-water binary system and for the PEG -DEG-water ternary system (see Tables S1-S8).

A typical diffusion experiment using the Gosting diffusimeter starts from preparing a sharp boundary (using a peristaltic pump) between two uniform solutions of slightly different solute concentrations located inside a vertical channel with inside width  $a$ . In our case, we have:  $a = 2.5057$  cm. The light source used for generating the Rayleigh interference pattern is a He-Ne Uniphase laser with wavelength  $\lambda = 543.5$  nm. A cell holder is located inside a water bath. The temperature of the bath was regulated at  $25.00 \pm 0.001$  °C. The cell holder has the function to support a Tiselius cell, where diffusion occurs, and a mask, which consists of a double window. Here the laser beam is splitted into two parts: one going through the diffusion channel of the Tiselius cell and one passing through the water bath (reference channel). A pair of two cylinder lenses focuses the diffusion channel onto the detector, where the Rayleigh interference pattern is observed and recorded. Rayleigh fringes shift horizontally as the refractive index,  $n$ , inside the diffusion channel changes with vertical height. This gives direct information about refractive index versus vertical position. The difference in refractive index,  $\Delta n$ , between the two solutions is related to the total number of interference fringes  $J$  by  $\Delta n = J\lambda/a$ .<sup>25,50</sup>

Each interferometric diffusion experiment requires the preparation of a pair of solutions with different composition. PEG and DEG are denoted with the labels “1” and “2” respectively. For each solution pair associated, their average molar concentration,  $\bar{C}_1$  and  $\bar{C}_2$ , and the corresponding difference,  $\Delta C_1$  and  $\Delta C_2$  are reported. To obtain the four ternary diffusion coefficients,  $(D_{ij})_V$ , at least four experiments were performed at the same mean composition,  $(\bar{C}_1, \bar{C}_2)$ , but with different values of  $\Delta C_1$  and  $\Delta C_2$ . These concentration differences define the number of fringes of a given experiment by:  $J = R_1 \Delta C_1 + R_2 \Delta C_2$ , where  $R_i = (a/\lambda)(\partial n/\partial C_i)_{C_j, i \neq j}$ . For our ternary system, the values:  $R_1 = 124000 \text{ cm}^3 \text{ mol}^{-1}$  and  $R_2 = 530 \text{ cm}^3 \text{ mol}^{-1}$  were determined fitting the experimental values of  $J$ . In Tables S3-8, six sets of ternary experiments are reported. In Tables S1-8, the following experimental parameters are also reported: densities of bottom and top solutions,  $d_{\text{top}}$  and  $d_{\text{bot}}$ ; the measured number of interference fringes,  $J_{\text{measd}}$ ; the number of interference fringes,  $J_{\text{calcd}}$ , calculated using  $R_1 \Delta C_1 + R_2 \Delta C_2$ , and the measured reduced-height-area ratio,  $D_A$ .<sup>25,50</sup>

The four ternary diffusion coefficients are determined by applying a well-established nonlinear least-squares method to the data of Rayleigh fringe positions.<sup>51</sup> Since diffusion experiments on binary PEG-water systems show a small polydispersity, accurate polydispersity corrections on fringe positions have been applied as described in ref 52 in details.

**Table S1.** Binary diffusion experiment data for PEG-water at 298.15 K

| expt                                                     | 1        |
|----------------------------------------------------------|----------|
| $\bar{C}_1$ (mM)                                         | 0.2500   |
| $\Delta C_1$ (mM)                                        | 0.4454   |
| $d_{bot}$ (g cm <sup>-3</sup> )                          | 0.998587 |
| $d_{top}$ (g cm <sup>-3</sup> )                          | 0.997092 |
| $J_{measd}$                                              | 54.970   |
| $D_A$ (10 <sup>-9</sup> m <sup>2</sup> s <sup>-1</sup> ) | 0.06116  |

**Table S2.** Binary diffusion experiment data for DEG-water at 298.15 K

| expt                                                     | 1        | 2        | 3        | 4        | 5        | 6        | 7        |
|----------------------------------------------------------|----------|----------|----------|----------|----------|----------|----------|
| $\bar{C}_2$ (M)                                          | 0.1000   | 0.2000   | 0.3000   | 0.5001   | 0.9997   | 1.9937   | 3.9301   |
| $\Delta C_2$ (M)                                         | 0.0931   | 0.0930   | 0.0930   | 0.0931   | 0.0931   | 0.0931   | 0.0914   |
| $d_{bot}$ (g cm <sup>-3</sup> )                          | 0.998953 | 1.000396 | 1.001657 | 1.004837 | 1.012143 | 1.026868 | 1.055142 |
| $d_{top}$ (g cm <sup>-3</sup> )                          | 0.997629 | 0.999156 | 1.000558 | 1.003485 | 1.010752 | 1.025373 | 1.053854 |
| $J_{measd}$                                              | 48.731   | 49.001   | 49.014   | 49.205   | 49.672   | 50.062   | 48.812   |
| $D_A$ (10 <sup>-9</sup> m <sup>2</sup> s <sup>-1</sup> ) | 0.8871   | 0.8761   | 0.8646   | 0.8431   | 0.7934   | 0.6988   | 0.5225   |

**Table S3.** Ternary diffusion experimental data for 0.25 mM PEG-0.10 M DEG-water at 298.15 K

| expt                                                     | 1        | 2        | 3        | 4        |
|----------------------------------------------------------|----------|----------|----------|----------|
| $\bar{C}_1$ (mM)                                         | 0.2500   | 0.2500   | 0.2501   | 0.2500   |
| $\bar{C}_2$ (M)                                          | 0.1000   | 0.1000   | 0.1000   | 0.1000   |
| $\Delta C_1$ (mM)                                        | 0.0000   | 0.0000   | 0.4455   | 0.4454   |
| $\Delta C_2$ (M)                                         | 0.0931   | 0.0931   | 0.0000   | 0.0000   |
| $d_{bot}$ (g cm <sup>-3</sup> )                          | 0.999830 | 0.999930 | 1.000015 | 0.999983 |
| $d_{top}$ (g cm <sup>-3</sup> )                          | 0.998621 | 0.998583 | 0.998529 | 0.998557 |
| $J_{measd}$                                              | 48.784   | 48.813   | 55.081   | 55.077   |
| $J_{calcd}$                                              | 48.792   | 48.805   | 55.067   | 55.091   |
| $D_A$ (10 <sup>-9</sup> m <sup>2</sup> s <sup>-1</sup> ) | 0.9073   | 0.9069   | 0.06085  | 0.06087  |

**Table S4.** Ternary diffusion experimental data for 0.25 mM PEG-0.20 M DEG-water at 298.15 K

| expt                                                     | 1        | 2        | 3        | 4        |
|----------------------------------------------------------|----------|----------|----------|----------|
| $\bar{C}_1$ (mM)                                         | 0.2500   | 0.2500   | 0.2500   | 0.2500   |
| $\bar{C}_2$ (M)                                          | 0.2000   | 0.2000   | 0.2000   | 0.2000   |
| $\Delta C_1$ (mM)                                        | 0.0000   | 0.0000   | 0.4454   | 0.4454   |
| $\Delta C_2$ (M)                                         | 0.0931   | 0.0931   | 0.0000   | 0.0000   |
| $d_{bot}$ (g cm <sup>-3</sup> )                          | 1.001386 | 1.001388 | 1.001449 | 1.001451 |
| $d_{top}$ (g cm <sup>-3</sup> )                          | 0.999976 | 0.999976 | 0.999978 | 0.999980 |
| $J_{measd}$                                              | 48.917   | 48.925   | 55.264   | 55.322   |
| $J_{calcd}$                                              | 48.921   | 48.921   | 55.293   | 55.293   |
| $D_A$ (10 <sup>-9</sup> m <sup>2</sup> s <sup>-1</sup> ) | 0.8970   | 0.8970   | 0.06100  | 0.06100  |

**Table S5.** Ternary diffusion experimental data for 0.25 mM PEG-0.50 M DEG-water at 298.15 K

| expt                                                     | 1        | 2        | 3        | 4        |
|----------------------------------------------------------|----------|----------|----------|----------|
| $\bar{C}_1$ (mM)                                         | 0.2500   | 0.2500   | 0.2500   | 0.2500   |
| $\bar{C}_2$ (M)                                          | 0.5001   | 0.5001   | 0.5000   | 0.5001   |
| $\Delta C_1$ (mM)                                        | 0.0000   | 0.0000   | 0.4454   | 0.4454   |
| $\Delta C_2$ (M)                                         | 0.09307  | 0.09307  | 0.0001   | 0.0000   |
| $d_{bot}$ (g cm <sup>-3</sup> )                          | 1.005655 | 1.005657 | 1.005668 | 1.005765 |
| $d_{top}$ (g cm <sup>-3</sup> )                          | 1.004339 | 1.004337 | 1.004156 | 1.004283 |
| $J_{measd}$                                              | 49.233   | 49.282   | 55.227   | 55.364   |
| $J_{calcd}$                                              | 49.257   | 49.258   | 55.296   | 55.295   |
| $D_A$ (10 <sup>-9</sup> m <sup>2</sup> s <sup>-1</sup> ) | 0.8655   | 0.8655   | 0.05941  | 0.05940  |

**Table S6.** Ternary diffusion experimental data for 0.25 mM PEG-1.00 M DEG-water at 298.15 K

| expt                                                     | 1        | 2        | 3        | 4        |
|----------------------------------------------------------|----------|----------|----------|----------|
| $\bar{C}_1$ (mM)                                         | 0.2499   | 0.2499   | 0.2499   | 0.2499   |
| $\bar{C}_2$ (M)                                          | 0.9997   | 0.9997   | 0.9997   | 0.9997   |
| $\Delta C_1$ (mM)                                        | 0.0000   | 0.0000   | 0.4452   | 0.4452   |
| $\Delta C_2$ (M)                                         | 0.0931   | 0.0930   | 0.0001   | 0.0001   |
| $d_{bot}$ (g cm <sup>-3</sup> )                          | 1.012997 | 1.012919 | 1.013042 | 1.013042 |
| $d_{top}$ (g cm <sup>-3</sup> )                          | 1.011638 | 1.011625 | 1.011521 | 1.011521 |
| $J_{measd}$                                              | 49.514   | 49.695   | 55.701   | 55.667   |
| $J_{calcd}$                                              | 49.623   | 49.587   | 55.684   | 55.684   |
| $D_A$ (10 <sup>-9</sup> m <sup>2</sup> s <sup>-1</sup> ) | 0.8139   | 0.8141   | 0.05803  | 0.05803  |

**Table S7.** Ternary diffusion experimental data for 0.25 mM PEG-1.99 M DEG-water at 298.15 K

| expt                                                     | 1        | 2        | 3        | 4        |
|----------------------------------------------------------|----------|----------|----------|----------|
| $\bar{C}_1$ (mM)                                         | 0.2492   | 0.2492   | 0.2493   | 0.2492   |
| $\bar{C}_2$ (M)                                          | 1.9934   | 1.9938   | 1.9939   | 1.9939   |
| $\Delta C_1$ (mM)                                        | 0.0001   | 0.0000   | 0.4514   | 0.4514   |
| $\Delta C_2$ (M)                                         | 0.0935   | 0.0930   | -0.0097  | -0.0098  |
| $d_{bot}$ (g cm <sup>-3</sup> )                          | 1.027650 | 1.027706 | 1.027750 | 1.027726 |
| $d_{top}$ (g cm <sup>-3</sup> )                          | 1.025951 | 1.026246 | 1.026359 | 1.026359 |
| $J_{measd}$                                              | 50.081   | 49.943   | 51.323   | 51.325   |
| $J_{calcd}$                                              | 50.136   | 49.887   | 51.339   | 51.310   |
| $D_A$ (10 <sup>-9</sup> m <sup>2</sup> s <sup>-1</sup> ) | 0.7147   | 0.7152   | 0.04753  | 0.04750  |

**Table S8.** Ternary diffusion experimental data for 0.25 mM PEG-3.93 M DEG-water at 298.15 K

| expt                                                     | 1        | 2        | 3        | 4        |
|----------------------------------------------------------|----------|----------|----------|----------|
| $\bar{C}_1$ (mM)                                         | 0.2456   | 0.2456   | 0.2456   | 0.2456   |
| $\bar{C}_2$ (M)                                          | 3.9297   | 3.9297   | 3.9300   | 3.9297   |
| $\Delta C_1$ (mM)                                        | 0.0000   | 0.0000   | 0.4361   | 0.4361   |
| $\Delta C_2$ (M)                                         | 0.0915   | 0.0915   | -0.0194  | -0.0195  |
| $d_{bot}$ (g cm <sup>-3</sup> )                          | 1.055874 | 1.055876 | 1.055847 | 1.055777 |
| $d_{top}$ (g cm <sup>-3</sup> )                          | 1.054555 | 1.054553 | 1.054707 | 1.054654 |
| $J_{measd}$                                              | 48.786   | 48.866   | 43.001   | 42.840   |
| $J_{calcd}$                                              | 48.830   | 48.821   | 42.897   | 42.943   |
| $D_A$ (10 <sup>-9</sup> m <sup>2</sup> s <sup>-1</sup> ) | 0.5317   | 0.5318   | 0.03414  | 0.03420  |

## Calculation of $\frac{m_2 \mu_{22}^{(m)}}{RT}$ for the DEG-H<sub>2</sub>O binary system at 298.15 K

According to the Van Laar equation applied to the DEG-H<sub>2</sub>O binary system, we have:

$$\frac{\mu_0 - \mu_0^*}{RT} = \ln x_0 + \frac{A}{\left(1 + \frac{A x_0}{B x_2}\right)^2}$$

$$\frac{\mu_2 - \mu_2^*}{RT} = \ln x_2 + \frac{B}{\left(1 + \frac{B x_2}{A x_0}\right)^2}$$

where  $\mu_i^*$  (with  $i = 0, 2$ ) is the chemical potential of pure component  $i$  and  $x_i$  is its mole fraction in the binary mixture. For the DEG-water system at 298.15 K, the following values were taken from ref 40:

$$A = -0.348$$

$$B = -0.90$$

If we insert  $x_2 = m_2 / (m_2 + 1000 / M_0)$  in the expression for  $\mu_2$  and then differentiate  $\mu_2$  with respect to  $m_2$ , we obtain:

$$\frac{m_2 \mu_{22}^{(m)}}{RT} = 1 - \frac{2M_0 B^2}{1000 A} \frac{m_2}{\left(1 + \frac{M_0 B}{1000 A} m_2\right)^3} - \frac{m_2}{m_2 + 1000 / M_0}$$

By applying this equation to the experimental  $m_2$ , we obtain the following values of  $m_2 \mu_{22}^{(m)} / RT$ :

| $C_2$ (M) | $m_2$ (mol kg <sup>-1</sup> ) | $m_2 \mu_{22}^{(m)} / RT$ |
|-----------|-------------------------------|---------------------------|
| 0.1000    | 0.1017                        | 1.0066                    |
| 0.2000    | 0.2053                        | 1.0130                    |
| 0.5000    | 0.5281                        | 1.0317                    |
| 0.9997    | 1.1093                        | 1.0604                    |
| 1.9938    | 2.4602                        | 1.1066                    |
| 3.9298    | 6.2054                        | 1.1424                    |

## Calculation of $\frac{m_1 \mu_{11}^{(m)}}{RT}$ for the PEG-H<sub>2</sub>O binary system at 298.15 K

We start from the virial expression of the water thermodynamic activity taken from ref 54:

$$\frac{\mu_0 - \mu_0^*}{RT} = -V_0^* c_1 \left( \frac{1}{M_1} + A c_1 + B c_1^2 \right)$$

where  $c_1 = C_1 M_1$  is the mass/volume concentration,  $\mu_0^*$  and  $V_0^*$  are the chemical potential and molar volume of pure water respectively, and the values

$$M_1 = 20729 \text{ g mol}^{-1}$$

$$A = 1.67 \times 10^{-3} \text{ mol cm}^3 \text{ g}^{-2}$$

$$B = 1.96 \times 10^{-2} \text{ mol cm}^6 \text{ g}^{-3}$$

were taken from Table 3 of ref x. The virial expression can be rewritten in terms of PEG molar concentration:

$$\frac{\mu_0 - \mu_0^*}{RT} = -V_0^* C_1 (1 + A' C_1 + B' C_1^2)$$

where  $A' \equiv A M_1^2 = 7.18 \times 10^2 \text{ M}^{-1}$  and  $B' \equiv B M_1^3 = 1.75 \times 10^5 \text{ M}^{-2}$ .

To obtain the expression of the PEG chemical potential, we differentiate  $\mu_0$  and use the Gibbs-Duhem equation at constant temperature and pressure:

$$d\mu_1 = -\frac{C_0}{C_1} d\mu_0 = \frac{V_0^* C_0}{C_1} (1 + 2A' C_1 + 3B' C_1^2) dC_1$$

We therefore obtain:

$$\frac{C_1 \mu_{11}^{(c)}}{RT} = (1 - \bar{V}_1 C_1) (1 + 2A' C_1 + 3B' C_1^2)$$

If we apply eq 4a to the PEG-H<sub>2</sub>O binary system, we finally obtain:

$$\frac{m_1 \mu_{11}^{(m)}}{RT} = (1 - C_1 \bar{V}_1) \frac{C_1 \mu_{11}^{(c)}}{RT} = (1 - \bar{V}_1 C_1)^2 (1 + 2A' C_1 + 3B' C_1^2)$$

At  $C_1 = 0.25 \text{ mM}$ , we obtain:  $m_1 \mu_{11}^{(m)} / RT = 1.38$ .
